# Supplementary material for: The role of DNA topoisomerase 1α (AtTOP1α) in regulating arabidopsis meiotic recombination and chromosome segregation
Source: PeerJ journal article supplement (doi:10.7717/peerj.17864), 2024-08-28

# Metaphase I

*top1 $\alpha$ 1* 45s rDNA probe

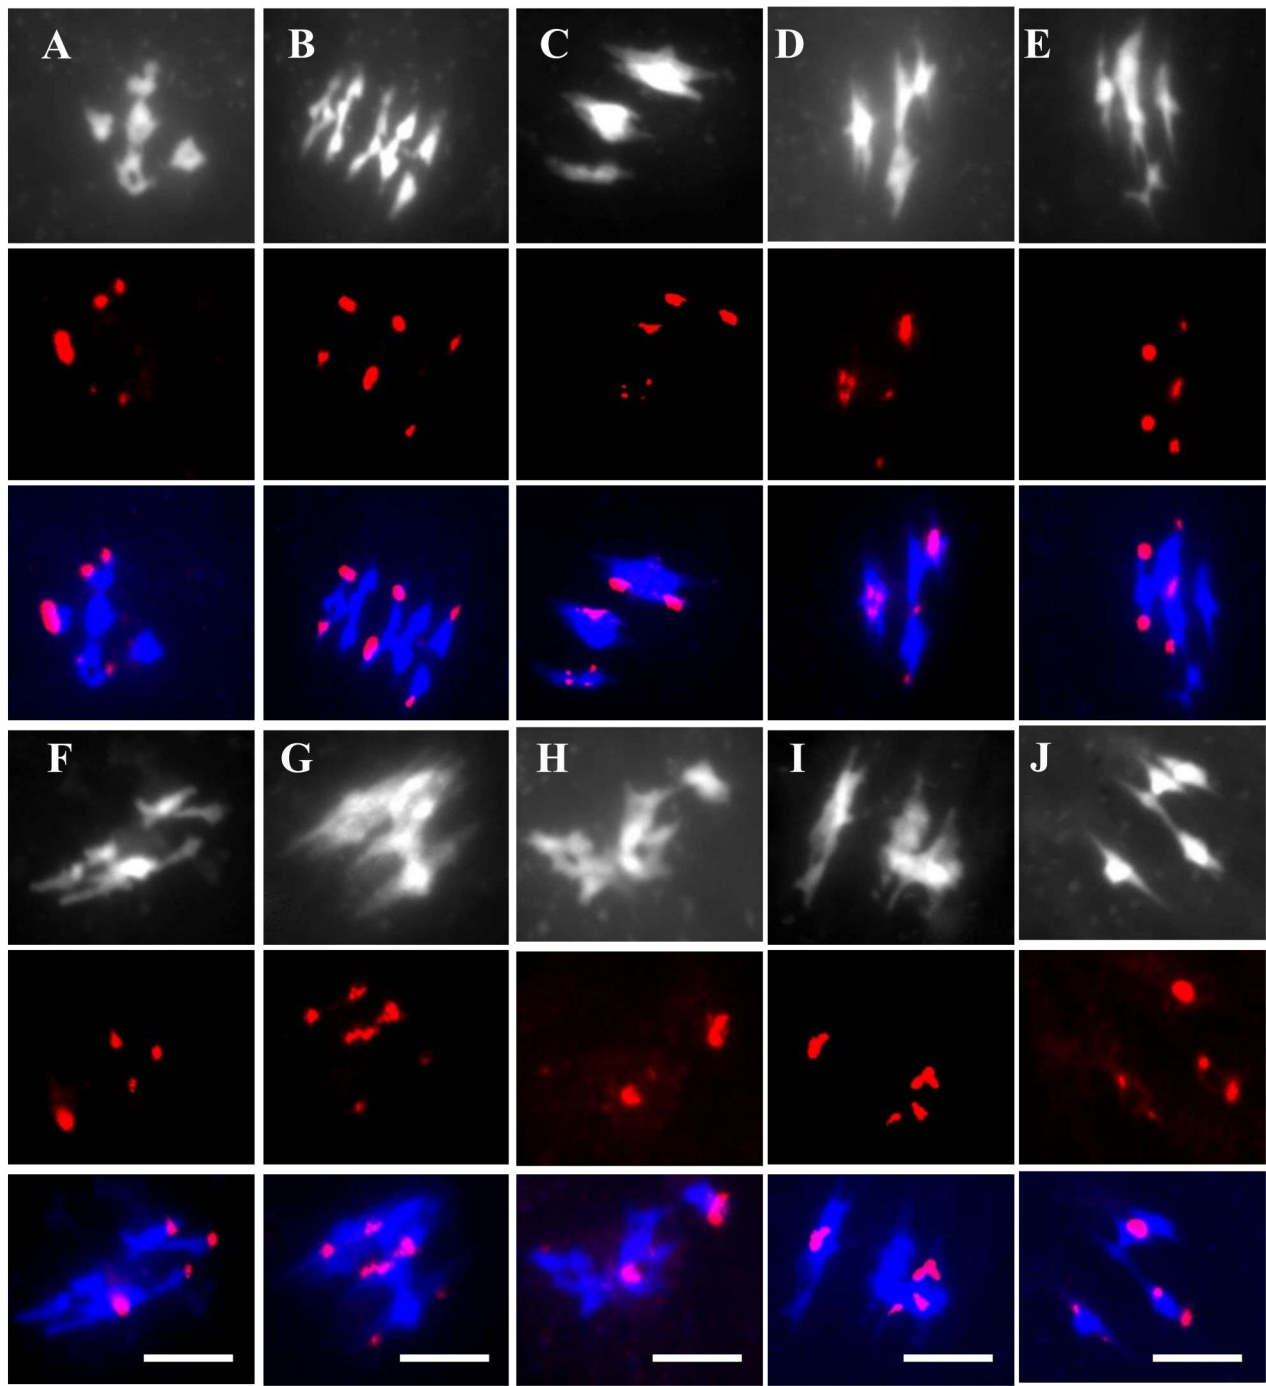

Supplement: Figure_S5.pdf [file Figure_S5.pdf]
