# Supplementary material for: The role of DNA topoisomerase 1α (AtTOP1α) in regulating arabidopsis meiotic recombination and chromosome segregation
Source: PeerJ. 2024 Aug 28;12:e17864. doi: 10.7717/peerj.17864 (PMC11365474; doi:10.7717/peerj.17864)
Supplement: Supplemental Information 2 [file peerj-12-17864-s002.xlsx]

## Sheet: Sheet1
	Well	Fluor	Target	Content	Sample	Cq
	G12	SYBR	Actin	Unkn	COL	23.2426
	G10	SYBR	Actin	Unkn	COL	23.3814
	G11	SYBR	Actin	Unkn	COL	23.4005
	A01	SYBR	TOP1	Unkn	COL	23.8953
	B01	SYBR	TOP1	Unkn	COL	24.3441
	C01	SYBR	TOP1	Unkn	COL	24.468
	H12	SYBR	Actin	Unkn	top1	24.858
	H10	SYBR	Actin	Unkn	top1	25.2076
	H11	SYBR	Actin	Unkn	top1	25.2359
	F01	SYBR	TOP1	Unkn	top1	30.8383
	E01	SYBR	TOP1	Unkn	top1	30.8407
	D01	SYBR	TOP1	Unkn	top1	31.1469

## Sheet: Sheet2
col	TOP1	23.8953	ACTIN	23.3814	0.513893	1.4279	0.8943	1.89647	0.752923	1	0.240298	0.138736
col	TOP1	24.3441	ACTIN	23.4005	0.943641	1.92338			1.01419
col	TOP1	24.468	ACTIN	23.2426	1.22536	2.33814			1.23289
top	TOP1	31.1469	ACTIN	25.2076	5.93933		-5.04503		0.0302896	0.0326427	0.00482749	0.00278715
top	TOP1	30.8407	ACTIN	25.2359	5.60475		-4.71045		0.0381955
top	TOP1	30.8383	ACTIN	24.858	5.98023		-5.08593		0.029443
