# Supplementary material for: The role of DNA topoisomerase 1α (AtTOP1α) in regulating arabidopsis meiotic recombination and chromosome segregation
Source: PeerJ. 2024 Aug 28;12:e17864. doi: 10.7717/peerj.17864 (PMC11365474; doi:10.7717/peerj.17864)
Supplement: Supplemental Information 3 [file peerj-12-17864-s003.xlsx]

## Sheet: Sheet1
The number of chiasmata formations per one PMC
Col	top1alpha
10	8
12	6
9	7
10	7
8	6
10	5
8	7
8	8
8	6
10	6
9	6
8	6
7	7
8	8
9	7
7	8
7	8
9	8
10	7
8	6
8	7
9	8
7	8
7	7
7	7
10	9
8	6
7	6
9	7
7	8
8	8
8	7
9	7
8	7
7	5
7	7
8	8
7	7
10	8
7	8
7	8
8	9
12	6
7	8
9	7
7	6
8	6
9	8
7	7
10	8
6	7
7	7
8	8
8	7
7	7
6	7
11	7
9	8
7	6
8	6
9	5
8	7
12	6
7	7
10	7
7	7
11	7
8	6
8	7
8	5
8	7
9	5
8	6
9	7
7	7
6	8
12	7
11	7
8	6
9	6
7	7
8	6
8	7
8	5
7	5
12	6
7	6
9	7
10	8
12	9
7	10
10	7
10	10
7	10
8	5
